# Supplementary material for: Viruses Infecting Greenhood Orchids (Pterostylidinae) in Eastern Australia
Source: MDPI journal article supplement (doi:10.3390/v14020365), 2022-02-10
Supplement: s1 [file s1]

**Table S1.** Assembly parameters for SPAdes.

| Sample | K-mers Used                                      | Minimum Input Read Length |
|--------|--------------------------------------------------|---------------------------|
| 13365  | 21,33,55 / 21,33,55,89,93,97 *                   | 100 bp                    |
| 13392  | 21,33,55,77,89,93,97,107,117,127                 | 130 bp                    |
| 13394  | 21,33,55,77,89,93,97,107,117,127                 | 130 bp                    |
| 13395  | 21,33,55,77,89,93,97,107,117,127                 | 130 bp                    |
| 13396  | 21,33,55,77,89,93,97,107,117,127                 | 130 bp                    |
| 13399  | 21,33,55,77,89,93,97,107,117,127                 | 100 bp                    |
| 13402  | 21,33,55,77,89,93,97,107,117,127                 | 130 bp                    |
| 13421  | 21,33,55,77,89,93,97,107,117,127                 | 130 bp                    |
| 13430  | 21,33,55,77,89,93,97,107,117,127                 | 130 bp                    |
| 13438  | 21,33,55,77,89,93,97,107,117,127                 | 130 bp                    |
| 13442  | 21,33,55,77,89,93,97,107,117,127                 | 130 bp                    |
| GF     | 21,33,55,77 / 21,33,55,77,89,93,97,107,117,127 * | 100 bp                    |
| HR     | 21,33,55,77 / 21,33,55,77,89,93,97,107,117,127 * | 100 bp                    |
| PI-1   | 21,33,55,77 / 21,33,55,77,89,93,97,107,117,127 * | 100 bp                    |
| PI-2   | 21,33,55,77 / 21,33,55,77,89,93,97,107,117,127 * | 100 bp                    |

\* Assembly was done twice, and any incomplete virus contigs from the first run were used as trusted contigs for the second run.

**Table S2.** Gene-specific primers used in rapid amplification of cDNA ends (RACE) and reverse transcription (RT)-PCR.

| Primer Sequence (5' to 3')         | Target Isolate        | Usage                                         |
|------------------------------------|-----------------------|-----------------------------------------------|
| TATGACCTAGAAGAAATGCTCAGAC          | PtBV-13365, L Segment | 5'-RACE First PCR                             |
| CCAGCATTGAGAGCACATGGATAC           | PtBV-13365, L Segment | 5'-RACE Nested PCR                            |
| TGTCTTAGTGAATCTTGCATGTATAG         | PtBV-13365, L Segment | 5'-RACE Sequencing                            |
| TGAAGATGACAAAATTGTCAGGAGTGG        | PtBV-13365, L Segment | 3'-RACE First PCR                             |
| AATGAAGTTTCTTCCTCACTAGC            | PtBV-13365, L Segment | 3'-RACE Nested PCR                            |
| TTTCTAATAATCCTTCAGTTTTGC           | PtBV-13365, L Segment | 3'-RACE Sequencing                            |
| CTGTCTTCTATTTTATTTGGATCCAC         | PtBV-13365, M Segment | 5'-RACE First PCR                             |
| TGCAGTTGGGCAAACCCATAC              | PtBV-13365, M Segment | 5'-RACE Nested PCR                            |
| ATATTTGTTTGCCATTGTCC               | PtBV-13365, M Segment | 5'-RACE Sequencing                            |
| TCTCCACTACTCAAAACAACCTGA-TAAGG     | PtBV-13365, M Segment | 3'-RACE First PCR                             |
| TTCTGAAATAGAACAATCACCTG            | PtBV-13365, M Segment | 3'-RACE Nested PCR                            |
| CCTTTCAAAACACATTGCTC               | PtBV-13365, M Segment | 3'-RACE Sequencing                            |
| AAGAATATCTGAAGATGA-TAATGGTTCATATCC | PtBV-13365, S Segment | 5'-RACE First PCR                             |
| TTTAATTGGAGAACCAGATATATCC          | PtBV-13365, S Segment | 5'-RACE Nested PCR                            |
| ATACATGGCAATGAAATAAATTG            | PtBV-13365, S Segment | 5'-RACE Sequencing                            |
| CATTGTTCAAAAATGTTGTTACAG           | PtBV-13365, S Segment | 3'-RACE First PCR                             |
| TAGTGCAAAGCTTTCAGATTCCAAACC        | PtBV-13365, S Segment | 3'-RACE Nested PCR                            |
| TTTCTTTCTATTTCTGATGATAGAGC         | PtBV-13365, S Segment | 3'-RACE Sequencing                            |
| TTGTGGAAAAGTTAACTCGCAC             | PtPV                  | 5'-RACE First PCR                             |
| GAGGCAAACCACCCAGTCAG               | PtPV                  | 5'-RACE Nested PCR                            |
| CAAGGAAAGGGAAGGATCTC               | PtPV                  | 5'-RACE Sequencing                            |
| AAGCCGCGTACGTATTGATCC              | PtPV                  | 3'-RACE First PCR                             |
| CCAGTTTATCTGGTGGTAGCTTGAG          | PtPV                  | 3'-RACE Nested PCR                            |
| TTCTTTGAGAACCAAGAATGAG             | PtPV                  | 3'-RACE Sequencing                            |
| GTGTATTCCATGCATCTGGC               | PtAEV                 | 5'-RACE cDNA Synthesis (Coding Strand)        |
| TAACGCATTAAGTGGTTGCC               | PtAEV                 | 5'-RACE First PCR (Coding Strand)             |
| ATTGCGCATCGTGTCATAAG               | PtAEV                 | 5'-RACE Nested PCR (Coding Strand)            |
| TACTCACCATGTGGACTGAC               | PtAEV                 | 5'-RACE Sequencing (Coding Strand)            |
| AAAGCAAAACAGTGAGTGGC               | PtAEV                 | 5'-RACE cDNA Synthesis (Complementary Strand) |
| GTTTCTTGTGTTGGGTGACG               | PtAEV                 | 5'-RACE First PCR (Complementary Strand)      |
| AAGGTTGAGGTGACTAACG                | PtAEV                 | 5'-RACE Nested PCR (Complementary Strand)     |
| GATTGAACGGGTTGGAATGG               | PtAEV                 | 5'-RACE Sequencing (Complementary Strand)     |
| AGTCAGCGATATTGCGCTCC               | PtAV-13365            | 5'-RACE cDNA Synthesis (Coding Strand)        |
| GCGGTGTACTTGTCACCGAC               | PtAV-13365            | 5'-RACE First PCR (Coding Strand)             |
| CTCAACCAGATCCTTCGGTTCG             | PtAV-13365            | 5'-RACE Nested PCR (Coding Strand)            |
| AGATAACGGAAGACCTTCTG               | PtAV-13365            | 5'-RACE Sequencing (Coding Strand)            |

|                            |              |                                               |
|----------------------------|--------------|-----------------------------------------------|
| AGATGGAATCGTAGCATACCCAATG  | PtAV-13365   | 5'-RACE cDNA Synthesis (Complementary Strand) |
| CTCTACGGTGACTACTCTTTATTACG | PtAV-13365   | 5'-RACE First PCR (Complementary Strand)      |
| TGATATACTTGCGTGGTGTG       | PtAV-13365   | 5'-RACE Nested PCR (Complementary Strand)     |
| TCTGAGGACAGCATCGCAGC       | PtAV-13365   | 5'-RACE Sequencing (Complementary Strand)     |
| ATCTCGTCAAAGTCGGGC         | PtAV-13438-2 | 5'-RACE cDNA Synthesis (Coding Strand)        |
| CCTTTCCTCCTTGACAGTTG       | PtAV-13438-2 | 5'-RACE First PCR (Coding Strand)             |
| AGATGAAGGTTGTGACGGTC       | PtAV-13438-2 | 5'-RACE Nested PCR (Coding Strand)            |
| TCATAGGTGATCCCTTGAGC       | PtAV-13438-2 | 5'-RACE Sequencing (Coding Strand)            |
| CACGGGAATCACCATTCTG        | PtAV-13438-2 | 5'-RACE cDNA Synthesis (Complementary Strand) |
| GCAGGCAATAAGGATCTTTTCG     | PtAV-13438-2 | 5'-RACE First PCR (Complementary Strand)      |
| AGTTTGGAACGACATCATC        | PtAV-13438-2 | 5'-RACE Nested PCR (Complementary Strand)     |
| CTTTTGACCTCCTGGGAGAC       | PtAV-13438-2 | 5'-RACE Sequencing (Complementary Strand)     |
| AGGGTAATTAGCCGCATCACG      | PtTV-13365   | 5'-RACE cDNA Synthesis (Coding Strand)        |
| CCTCATGAACACAAATCGCATCATG  | PtTV-13365   | 5'-RACE First PCR (Coding Strand)             |
| AGTGTTGCTGACAGTACATC       | PtTV-13365   | 5'-RACE Nested PCR (Coding Strand)            |
| GGCAGCAGTCATCGGCTG         | PtTV-13365   | 5'-RACE Sequencing (Coding Strand)            |
| TTTCGCACAAACGTTGACATCTG    | PtTV-13365   | 5'-RACE cDNA Synthesis (Complementary Strand) |
| TTGTATACTTGGAACCATCGGACC   | PtTV-13365   | 5'-RACE First PCR (Complementary Strand)      |
| GACTGGTCAATTAAACGAGTG      | PtTV-13365   | 5'-RACE Nested PCR (Complementary Strand)     |
| GTGGAGAAGGCTCGGTTTGC       | PtTV-13365   | 5'-RACE Sequencing (Complementary Strand)     |
| GCACCGGATCAATCAACC         | PtTV-13421-2 | 5'-RACE cDNA Synthesis (Coding Strand)        |
| TGAAACAGAATCGCAGCATG       | PtTV-13421-2 | 5'-RACE First PCR (Coding Strand)             |
| GTA CTGCTGTTCAAACCG        | PtTV-13421-2 | 5'-RACE Nested PCR (Coding Strand)            |
| GAACAGTGAGTATGCCAGAG       | PtTV-13421-2 | 5'-RACE Sequencing (Coding Strand)            |
| CACGGGAATCACCATTCTG        | PtTV-13421-2 | 5'-RACE cDNA Synthesis (Complementary Strand) |
| GCAGGCAATAAGGATCTTTTCG     | PtTV-13421-2 | 5'-RACE First PCR (Complementary Strand)      |
| AGTTTGGAACGACATCATC        | PtTV-13421-2 | 5'-RACE Nested PCR (Complementary Strand)     |
| CTTTTGACCTCCTGGGAGAC       | PtTV-13421-2 | 5'-RACE Sequencing (Complementary Strand)     |

|                         |                                     |                                                        |
|-------------------------|-------------------------------------|--------------------------------------------------------|
| AGCAGTGAATACAAAGTCTTTGG | PtBV Nucleocapsid Gene              | RT-PCR (653 bp Amplicon) Forward Primer and Sequencing |
| GAGGCACAATTTTCACTTCAAC  | PtBV Nucleocapsid Gene              | RT-PCR (653 bp Amplicon) Reverse Primer and Sequencing |
| TAAACAGTTGGTTGAGCAGC    | PtAEV Glycotransferase Domain       | RT-PCR (305 bp Amplicon) Forward Prime and Sequencing  |
| GACAAGTATGTGCACAGTGG    | PtAEV Glycotransferase Domain       | RT-PCR (305 bp Amplicon) Reverse Primer and Sequencing |
| GGTATGATACCTAGTGTTCTCT  | PtAV1 ORF2                          | RT-PCR (432 bp Amplicon) Forward Prime and Sequencing  |
| CGCTAAAAACTTTGGCTTACG   | PtAV1 ORF2                          | RT-PCR (432 bp Amplicon) Reverse Primer and Sequencing |
| CTATATCACATGCGCTCTCCG   | PtAV1 ORF2 Amplicon of PtAV-13395-1 | Sequencing (Forward)                                   |
| TAAGATCTTGCTTGTGCCCTG   | PtAV1 ORF2 Amplicon of PtAV-13395-1 | Sequencing (Reverse)                                   |
| ATACATTACATGCGCATTACA   | PtAV1 ORF2 Amplicon of PtAV-13395-2 | Sequencing (Forward)                                   |
| CAAAATCTTGCTCGTGCCCAA   | PtAV1 ORF2 Amplicon of PtAV-13395-2 | Sequencing (Reverse)                                   |
| GGAGGTAATTCTGAACGATGC   | PtAV2 (PtAV-13438-2) ORF2           | RT-PCR (496 bp Amplicon) Forward Primer and Sequencing |
| AGGGAATATCATGCCTCCTG    | PtAV2 (PtAV-13438-2) ORF2           | RT-PCR (496 bp Amplicon) Reverse Primer and Sequencing |
| CACGTACGCTCCATAGTG      | PtPV Capsid Gene                    | RT-PCR (646 bp Amplicon) Forward Primer and Sequencing |
| CCCTGGTTCCTCGTCTAC      | PtPV Capsid Gene                    | RT-PCR (646 bp Amplicon) Reverse Primer and Sequencing |
| GATGGACTACGGAGCAGAAC    | PtTV (Excluding PtTV-13421-2) ORF2  | RT-PCR (662 bp Amplicon) Forward Primer and Sequencing |
| ACATCATGAACGTGCCYACTATT | PtTV (Excluding PtTV-13421-2) ORF2  | RT-PCR (662 bp Amplicon) Reverse Primer and Sequencing |
| GATGGACTATGGAGCCGATC    | PtTV-13421-2 ORF2                   | RT-PCR (662 bp Amplicon) Forward Primer and Sequencing |
| ACATCAAAAATGTGCTCACAACC | PtTV-13421-2 ORF2                   | RT-PCR (662 bp Amplicon) Reverse Primer and Sequencing |

---

**Table S3.** Sources of orthotospovirus and Dugbe virus sequences.

| Genus                  | Virus                                 | Abbreviation | GenBank Accession Number |                                 |          |
|------------------------|---------------------------------------|--------------|--------------------------|---------------------------------|----------|
|                        |                                       |              | L                        | M                               | S        |
| <i>Orthotospovirus</i> | Alstroemeria necrotic streak virus    | ANSV         | MG696851                 | MG696852 MK275259<br>(NSm) (GP) | MG696853 |
| <i>Orthotospovirus</i> | Alstroemeria yellow spot virus        | AYSV         | MF469033                 | MF469034                        | MF469035 |
| <i>Orthotospovirus</i> | Barleria chlorosis-associated virus   | BCaV         | MW251496                 | MW251497                        | MW251498 |
| <i>Orthotospovirus</i> | Bean necrotic mosaic virus            | BeNMV        | JF417980                 | JN587269                        | JN587268 |
| <i>Orthotospovirus</i> | Calla lily chlorotic spot virus       | CCSV         | FJ822962                 | DQ256125                        | DQ256123 |
| <i>Orthotospovirus</i> | Capsicum chlorosis virus              | CaCV         | DQ256124                 | FJ822961                        | AY867502 |
| <i>Orthotospovirus</i> | Chilli yellow ringspot virus          | CYRSV        | MH779497                 | MH779496                        | MH779495 |
| <i>Orthotospovirus</i> | Chrysanthemum stem necrosis virus     | CSNV         | KM114546                 | KM114547                        | KM114548 |
| <i>Orthotospovirus</i> | Groundnut chlorotic fan-spot virus    | GCFSV        | KP146140                 | U42555                          | U27809   |
| <i>Orthotospovirus</i> | Groundnut ringspot virus              | GRSV         | MH742956                 | KP146141                        | AF080526 |
| <i>Orthotospovirus</i> | Groundnut bud necrosis virus          | GBNV         | AF025538                 | AB061773                        | AB038343 |
| <i>Orthotospovirus</i> | Hippeastrum chlorotic spot virus      | HCRV         | HG763861                 | MH742957                        | MH742958 |
| <i>Orthotospovirus</i> | Impatiens necrotic spot virus         | INSV         | X93218                   | JX833565                        | JX833564 |
| <i>Orthotospovirus</i> | Iris yellow spot virus                | IYSV         | FJ623474                 | M74904                          | X66972   |
| <i>Orthotospovirus</i> | Melon severe mosaic virus             | MSMV         | KX698424                 | AF214014                        | AF001387 |
| <i>Orthotospovirus</i> | Melon yellow spot virus               | MYSV         | AB061774                 | KX698423                        | KX698422 |
| <i>Orthotospovirus</i> | Mulberry vein banding virus           | MVBaV        | KM819698                 | KM819699                        | KM819701 |
| <i>Orthotospovirus</i> | Pepper chlorotic spot virus           | PCSV         | KX247379                 | KX247378                        | KX247377 |
| <i>Orthotospovirus</i> | Polygonum ringspot virus              | PolRSV       | KJ541746                 | KJ541745                        | KJ541744 |
| <i>Orthotospovirus</i> | Scadoxus chlorotic ringspot virus     | ScCRV        | MW080808                 | MW080809                        | MW080810 |
| <i>Orthotospovirus</i> | Soybean vein necrosis virus           | SVNV         | HQ728385                 | HQ728386                        | HQ728387 |
| <i>Orthotospovirus</i> | Tomato chlorotic spot virus           | TCSV         | MH742959                 | MH742960                        | MH742961 |
| <i>Orthotospovirus</i> | Tomato necrotic ringspot virus        | TNRV         | MW256413                 | MW256414                        | MW256415 |
| <i>Orthotospovirus</i> | Tomato necrotic spot associated virus | TNSaV        | KT984754                 | KT984753                        | KM355773 |
| <i>Orthotospovirus</i> | Tomato spotted wilt virus             | TSWV         | KT717691                 | KT717692                        | KT717693 |
| <i>Orthotospovirus</i> | Tomato yellow ring virus              | TYRV         | JN560178                 | JN560177                        | AY686718 |
| <i>Orthotospovirus</i> | Tomato zonate spot virus              | TZSV         | EF552435                 | EF552434                        | EF552433 |
| <i>Orthotospovirus</i> | Watermelon bud necrosis virus         | WBNV         | GU735408                 | GU584185                        | GU584184 |
| <i>Orthotospovirus</i> | Watermelon silver mottle virus        | WSMoV        | AF133128                 | U75379                          | U78734   |
| <i>Orthotospovirus</i> | Zucchini lethal chlorosis virus       | ZLCV         | KU641378                 | KU641379                        | KU641380 |
| <i>Orthonairovirus</i> | Dugbe virus                           | DUGV         | U15018                   |                                 |          |

NSm: non-structural protein, M segment; GP: glycoprotein precursor.

**Table S4.** Sources of endornavirus and grapevine leafroll-associated virus 1 sequences.

| Genus                    | Virus                                 | Abbreviation | GenBank Accession |
|--------------------------|---------------------------------------|--------------|-------------------|
|                          |                                       |              | Number            |
| <i>Alphaendornavirus</i> | Agaricus bisporus endornavirus 1      | AbEV1        | KY357509          |
| <i>Alphaendornavirus</i> | Basella alba endornavirus 1           | BaEV1        | AB844264          |
| <i>Alphaendornavirus</i> | Bell pepper endornavirus              | BPEV         | KX977569          |
| <i>Alphaendornavirus</i> | Cluster bean endornavirus 1           | CBEV1        | MG764084          |
| <i>Alphaendornavirus</i> | Cucumis melo endornavirus             | CmEV         | KT727022          |
| <i>Alphaendornavirus</i> | Erysiphe cichoracearum endornavirus   | EcEV         | KT388110          |
| <i>Alphaendornavirus</i> | Grapevine endophyte endornavirus      | GEEV         | JX678977          |
| <i>Alphaendornavirus</i> | Helianthus annuus endornavirus        | HaEV         | MF362666          |
| <i>Alphaendornavirus</i> | Helicobasidium mompa endornavirus 1   | HmEV1        | AB218287          |
| <i>Alphaendornavirus</i> | Hordeum vulgare endornavirus          | HvEV         | KT721705          |
| <i>Alphaendornavirus</i> | Hot pepper endornavirus               | HPEV         | KR080326          |
| <i>Alphaendornavirus</i> | Lagenaria siceraria endornavirus      | LsEV         | KF562072          |
| <i>Alphaendornavirus</i> | Oryza rufipogon endornavirus          | OrEV         | AB014344          |
| <i>Alphaendornavirus</i> | Oryza sativa endornavirus             | OsEV         | D32136            |
| <i>Alphaendornavirus</i> | Persea americana endornavirus 1       | PaEV1        | JN880414          |
| <i>Alphaendornavirus</i> | Phaseolus vulgaris endornavirus 1     | PvEV1        | KT456287          |
| <i>Alphaendornavirus</i> | Phaseolus vulgaris endornavirus 2     | PvEV2        | KT456288          |
| <i>Alphaendornavirus</i> | Phaseolus vulgaris endornavirus 3     | PvEV3        | MG242064          |
| <i>Alphaendornavirus</i> | Phytophthora endornavirus 1           | PEV1         | AJ877914          |
| <i>Alphaendornavirus</i> | Rhizoctonia cerealis endornavirus 1   | RcEV1        | KF311065          |
| <i>Alphaendornavirus</i> | Rhizoctonia solani endornavirus 2     | RsEV2        | KT823701          |
| <i>Alphaendornavirus</i> | Vicia faba endornavirus               | VfEV         | AJ000929          |
| <i>Alphaendornavirus</i> | Winged bean endornavirus 1            | WBEV1        | LC144945          |
| <i>Alphaendornavirus</i> | Yerba mate endornavirus               | YmEV         | KJ634409          |
| <i>Betaendornavirus</i>  | Tuber aestivum endornavirus           | TaEV         | HQ380014          |
| <i>Ampelovirus</i>       | Grapevine leafroll-associated virus 1 | GLRaV1       | JQ023131          |

**Table S5.** Sources of amalgavirus, *Zygosaccharomyces bailii* virus Z and Amasya cherry disease associated chrysovirus sequences.

| Genus                   | Virus                                        | Abbreviation | GenBank Accession Number |
|-------------------------|----------------------------------------------|--------------|--------------------------|
| <i>Amalgavirus</i>      | Allium cepa amalgavirus 1                    | AcAV1        | BK010347                 |
| <i>Amalgavirus</i>      | Allium cepa amalgavirus 2                    | AcAV2        | BK010348                 |
| <i>Amalgavirus</i>      | Blueberry latent virus                       | BBLV         | HM029246                 |
| <i>Amalgavirus</i>      | Rhododendron virus A                         | RhVA         | HQ128706                 |
| <i>Amalgavirus</i>      | Southern tomato virus                        | STV          | EF442780                 |
| <i>Amalgavirus</i>      | Spinach amalgavirus 1                        | SpAV1        | KY695011                 |
| <i>Amalgavirus</i>      | Vicia cryptic virus M                        | VCVM         | EU371896                 |
| <i>Amalgavirus</i>      | Zoostera marina amalgavirus 1                | ZmAV1        | KY783316                 |
| <i>Amalgavirus</i>      | Zoostera marina amalgavirus 2                | ZmAV2        | KY783317                 |
| <i>Zybavirus</i>        | <i>Zygosaccharomyces bailii</i> virus Z      | ZbV-Z        | KU200450                 |
| <i>Alphachrysovirus</i> | Amasya cherry disease associated chrysovirus | ACDACV       | AJ781166                 |

**Table S6.** Sources of totivirus and Amasya cherry disease associated chrysovirus sequences.

| Genus                   | Virus                                          | Abbreviation | GenBank Accession Number |
|-------------------------|------------------------------------------------|--------------|--------------------------|
| <i>Totivirus</i>        | <i>Pterostylis sanguinea</i> totivirus A       | PtSTVA       | KU291927                 |
| <i>Totivirus</i>        | <i>Saccharomyces cerevisiae</i> virus L-A      | ScVLA        | J04692                   |
| <i>Totivirus</i>        | <i>Saccharomyces cerevisiae</i> virus LBCLa    | ScVLBC       | U01060                   |
| <i>Totivirus</i>        | <i>Scheffersomyces segobiensis</i> virus L     | SsV1         | KC610514                 |
| <i>Totivirus</i>        | <i>Tuber aestivum</i> virus 1                  | TaV1         | HQ158596                 |
| <i>Totivirus</i>        | <i>Ustilago maydis</i> virus H1                | UmVH1        | U01059                   |
| <i>Totivirus</i>        | <i>Xanthophyllomyces dendrorhous</i> virus L1A | XdVL1A       | JN997472                 |
| <i>Totivirus</i>        | <i>Xanthophyllomyces dendrorhous</i> virus L1B | XdVL1B       | JN997473                 |
| <i>Alphachrysovirus</i> | Amasya cherry disease associated chrysovirus   | ACDACV       | AJ781166                 |

**Table S7.** Sources of polerovirus and enamovirus sequences.

| <b>Genus</b>       | <b>Virus</b>                       | <b>Abbreviation</b> | <b>GenBank Accession Number</b> |
|--------------------|------------------------------------|---------------------|---------------------------------|
| <i>Polerovirus</i> | Beet chlorosis virus               | BChV                | AF352024                        |
| <i>Polerovirus</i> | Beet mild yellowing virus          | BMVYV               | X83110                          |
| <i>Polerovirus</i> | Beet western yellows virus         | BWYV                | AF473561                        |
| <i>Polerovirus</i> | Carrot red leaf virus              | CtRLV               | AY695933                        |
| <i>Polerovirus</i> | Cereal yellow dwarf virus RPS      | CYDV-RPS            | AF235168                        |
| <i>Polerovirus</i> | Cereal yellow dwarf virus RPV      | CYDV-RPV            | L25299                          |
| <i>Polerovirus</i> | Chickpea chlorotic stunt virus     | CpCSV               | AY956384                        |
| <i>Polerovirus</i> | Cotton leafroll dwarf virus        | CLDV                | GU167940                        |
| <i>Polerovirus</i> | Cucurbit aphid-borne yellows virus | CAbYV               | X76931                          |
| <i>Polerovirus</i> | Faba bean polerovirus 1            | FBPV1               | MH464873                        |
| <i>Polerovirus</i> | Maize yellow dwarf virus RMV       | MYDVRMV             | KC921392                        |
| <i>Polerovirus</i> | Maize yellow mosaic virus          | MaYMV               | KU248489                        |
| <i>Polerovirus</i> | Melon aphid-borne yellows virus    | MABYV               | EU000534                        |
| <i>Polerovirus</i> | Pepo aphid-borne yellows virus     | PABYV               | KU315177                        |
| <i>Polerovirus</i> | Pepper vein yellows virus 1        | PeVYV-1             | AB594828                        |
| <i>Polerovirus</i> | Pepper vein yellows virus 2        | PeVYV-2             | HM439608                        |
| <i>Polerovirus</i> | Pepper vein yellows virus 3        | PeVYV-3             | KP326573                        |
| <i>Polerovirus</i> | Pepper vein yellows virus 4        | PeVYV-4             | KU999109                        |
| <i>Polerovirus</i> | Pepper vein yellows virus 5        | PeVYV-5             | KY523072                        |
| <i>Polerovirus</i> | Pepper vein yellows virus 6        | PeVYV-6             | LT559483                        |
| <i>Polerovirus</i> | Potato leafroll virus              | PLRV                | D00530                          |
| <i>Polerovirus</i> | Pumpkin polerovirus                | PuPV                | MG800833                        |
| <i>Polerovirus</i> | Suakwa aphid-borne yellows virus   | SAbYV               | JQ700308                        |
| <i>Polerovirus</i> | Sugarcane yellow leaf virus        | ScYLV               | AF157029                        |
| <i>Polerovirus</i> | Tobacco vein distorting virus      | TVDV                | EF529624                        |
| <i>Polerovirus</i> | Turnip yellows virus               | TuYV                | X13063                          |
| <i>Enamovirus</i>  | Alfalfa enamovirus 1               | AEV1                | KU297983                        |
| <i>Enamovirus</i>  | Citrus vein enation virus          | CVEV                | HF679486                        |
| <i>Enamovirus</i>  | Grapevine enamovirus 1             | GEV1                | KX645875                        |
| <i>Enamovirus</i>  | Pea enation mosaic virus 1         | PEMV1               | HM439775                        |



**Table S8.** Numbers of paired reads before and after trimming.

| Sample   | Raw Data              | Assembly*             | Mapping**             |
|----------|-----------------------|-----------------------|-----------------------|
| 13365*** | 27,654,877 27,099,376 | 19,020,569 17,616,117 | 22,338,523 22,056,390 |
|          | 28,022,954            | 22,763,158            | 24,106,815            |
| 13392    | 28,337,237            | 12,522,368            | 13,524,332            |
| 13394    | 24,458,259            | 10,070,330            | 11,569,876            |
| 13395    | 20,649,715            | 7,922,337             | 9,044,726             |
| 13396    | 24,316,593            | 11,199,377            | 12,221,386            |
| 13399    | 28,257,471            | 11,741,532            | 12,647,860            |
| 13402    | 20,913,028            | 8,931,944             | N/A                   |
| 13421    | 24,638,458            | 10,813,580            | 11,905,838            |
| 13430    | 28,686,506            | 11,388,182            | 12,791,672            |
| 13438    | 23,698,290            | 10,320,423            | 11,623,667            |
| 13442    | 21,592,081            | 8,567,868             | 9,754,992             |
| GF       | 2,430,909             | 937,766               | 1,006,729             |
| HR       | 3,010,297             | 1,037,906             | 1,134,158             |
| PI-1     | 1,172,786             | 959,962               | N/A                   |
| PI-2     | 3,344,246             | 2,718,254             | N/A                   |

\* Trimmed to 100 bp or 130 bp, see Table S2. \*\* Trimmed to 30 bp. \*\*\* This sample was sequenced using three lanes of a flow cell and thus contains three datasets. N/A Not applicable as the process was not performed.

**Table S9.** Substitution models used in reconstructing maximum likelihood trees in Figures 3 to 7.

| Figure | Nucleotide Substitution Models                                                 |
|--------|--------------------------------------------------------------------------------|
| 3      | RdRp: GTR+F+R5, GP: GTR+F+R5, NSm: GTR+F+G4, NSs: TPM3u+F+I+G4, N: GTR+F+I+G4  |
| 4      | GTR+F+R5                                                                       |
| 5      | TVM+F+R3                                                                       |
| 6      | GTR+F+G4                                                                       |
| 7      | Four conserved regions from 5' to 3': TIM2e+R4, SYM+I+G4, TIM2e+I+G4, TIM2e+R3 |

RdRp: RNA dependent RNA polymerase; GP: glycoprotein precursor; NSm: non-structural protein, M segment; NSs: non-structural protein, S segment; N: nucleocapsid protein.

**Table S10.** Closest matches of each Pterostylis blotch virus protein from BLASTP searches of the NCBI non-redundant protein sequence database.

| <b>Virus Protein</b> | <b>Isolate</b> | <b>Virus Name of the Closest Hit</b> | <b>GenBank Accession Number of the Closest Hit</b> | <b>E-value</b> | <b>Query Coverage (%)</b> | <b>Pairwise Identity (%)</b> |
|----------------------|----------------|--------------------------------------|----------------------------------------------------|----------------|---------------------------|------------------------------|
| RdRp                 | PtBV-13365     | Barleria chlorosis-associated virus  | QVY47424.1                                         | 0.0            | 99                        | 50.8                         |
|                      | PtBV-GF        | Barleria chlorosis-associated virus  | QVY47424.1                                         | 0.0            | 99                        | 50.9                         |
|                      | PtBV-HR        | Barleria chlorosis-associated virus  | QVY47424.1                                         | 0.0            | 99                        | 50.7                         |
|                      | PtBV-13399     | Barleria chlorosis-associated virus  | QVY47419.1                                         | 0.0            | 99                        | 50.7                         |
| NSm                  | PtBV-13365     | groundnut ringspot virus             | AAM47012.1                                         | 5.E-93         | 84                        | 50.2                         |
|                      | PtBV-GF        | groundnut ringspot virus             | AAM47012.1                                         | 4.E-93         | 84                        | 50.2                         |
|                      | PtBV-HR        | groundnut ringspot virus             | AAM47012.1                                         | 2.E-93         | 84                        | 50.6                         |
|                      | PtBV-13399     | groundnut ringspot virus             | QBC75818.1                                         | 1.E-91         | 79                        | 51.6                         |
| GP                   | PtBV-13365     | Barleria chlorosis-associated virus  | QVY47426.1                                         | 0.0            | 94                        | 44.3                         |
|                      | PtBV-GF        | Barleria chlorosis-associated virus  | QVY47426.1                                         | 0.0            | 94                        | 44.2                         |
|                      | PtBV-HR        | Barleria chlorosis-associated virus  | QVY47426.1                                         | 0.0            | 94                        | 44.1                         |
|                      | PtBV-13399     | Barleria chlorosis-associated virus  | QVY47426.1                                         | 0.0            | 94                        | 44.4                         |
| NSs                  | PtBV-13365     | tomato chlorotic spot virus          | QBC75815.1                                         | 2.E-15         | 93                        | 21.1                         |
|                      | PtBV-GF        | groundnut ringspot virus             | AYA95028.1                                         | 2.E-16         | 96                        | 23.7                         |
|                      | PtBV-HR        | groundnut ringspot virus             | AYA95028.1                                         | 2.E-16         | 96                        | 23.7                         |
|                      | PtBV-13399     | impatiens necrotic spot virus        | QAU55706.1                                         | 1.E-12         | 93                        | 23.1                         |
| N                    | PtBV-13365     | bean necrotic mosaic virus           | YP_006468900.1                                     | 6.E-45         | 96                        | 39.7                         |
|                      | PtBV-GF        | bean necrotic mosaic virus           | YP_006468900.1                                     | 6.E-45         | 96                        | 39.7                         |
|                      | PtBV-HR        | bean necrotic mosaic virus           | YP_006468900.1                                     | 6.E-45         | 96                        | 39.7                         |
|                      | PtBV-13399     | bean necrotic mosaic virus           | YP_006468900.1                                     | 3.E-44         | 96                        | 39.3                         |

RdRp: RNA dependent RNA polymerase; GP: glycoprotein precursor; NSm: non-structural protein, M segment; NSs: non-structural protein, S segment; N: nucleocapsid protein.

**Table S11.** Pairwise sequence identities (%) of the orthotospoviruses identified in this study.

| Gene/Protein |            | PtBV-13365 | PtBV-GF | PtBV-HR | PtBV-13399 |
|--------------|------------|------------|---------|---------|------------|
| RdRp         | PtBV-13365 |            | 99.5    | 99.4    | 97.8       |
| NSm          |            |            | 99.7    | 98.2    | 97.9       |
| GP           |            |            | 99.7    | 99.3    | 98.9       |
| NSs          |            |            | 98.2    | 98.2    | 93.4       |
| N            |            |            | 100.0   | 100.0   | 99.6       |
| RdRp         | PtBV-GF    | 98.10      |         | 99.7    | 97.8       |
| NSm          |            | 99.18      |         | 98.5    | 97.6       |
| GP           |            | 99.22      |         | 99.3    | 98.9       |
| NSs          |            | 98.30      |         | 100.0   | 94.0       |
| N            |            | 98.37      |         | 100.0   | 99.6       |
| RdRp         | PtBV-HR    | 98.2       | 99.1    |         | 97.7       |
| NSm          |            | 98.3       | 98.5    |         | 96.6       |
| GP           |            | 98.0       | 98.1    |         | 98.5       |
| NSs          |            | 98.0       | 99.0    |         | 94.0       |
| N            |            | 97.8       | 98.9    |         | 99.6       |
| RdRp         | PtBV-13399 | 90.1       | 90.2    | 90.2    |            |
| NSm          |            | 96.1       | 95.7    | 95.6    |            |
| GP           |            | 96.6       | 96.7    | 96.5    |            |
| NSs          |            | 91.4       | 91.7    | 91.4    |            |
| N            |            | 92.0       | 93.1    | 92.5    |            |

Nucleic acid identities (in black font) are shown in the bottom left half of the table while amino acid identities (in red font) are shown in the top right half. RdRp: RNA dependent RNA polymerase; GP: glycoprotein precursor; NSm: non-structural protein, M segment; NSs: non-structural protein, S segment; N: nucleocapsid protein.

**Table S12.** Pairwise sequence identities (%) of the amalgaviruses identified in this study.

|                  | PtAV-<br>13365 | PtAV-<br>13392 | PtAV-<br>13394 | PtAV-<br>13395-<br>1 | PtAV-<br>13395-<br>2 | PtAV-<br>13396 | PtAV-<br>13421 | PtAV-<br>13430 | PtAV-<br>13438-<br>1 | PtAV-<br>13438-<br>2 | PtAV-<br>13442 |
|------------------|----------------|----------------|----------------|----------------------|----------------------|----------------|----------------|----------------|----------------------|----------------------|----------------|
| PtAV-13365       |                | 88.7<br>90.3   | 89.1<br>90.1   | 89.2<br>90.2         | 96.5<br>96.5         | 96.8<br>96.8   | 99.3<br>99.2   | 88.7<br>90.2   | 99.5<br>99.5         | 40.6<br>46.7         | 96.9<br>96.9   |
| PtAV-13392       | 85.1<br>86.5   |                | 92.5<br>93.1   | 92.6<br>93.2         | 88.9<br>90.5         | 88.9<br>90.5   | 89.0<br>90.8   | 99.5<br>99.5   | 88.9<br>90.5         | 41.0<br>46.8         | 88.9<br>90.4   |
| PtAV-13394       | 85.5<br>86.7   | 89.5<br>90.2   |                | 99.9<br>99.9         | 89.4<br>90.4         | 89.5<br>90.4   | 89.4<br>90.6   | 92.7<br>93.3   | 89.2<br>90.4         | 41.2<br>47.4         | 89.3<br>90.1   |
| PtAV-13395-<br>1 | 85.8<br>87.2   | 89.5<br>90.3   | 99.2<br>99.3   |                      | 89.4<br>90.4         | 89.5<br>90.4   | 89.5<br>90.8   | 92.8<br>93.5   | 89.3<br>90.5         | 41.2<br>47.4         | 89.4<br>90.2   |
| PtAV-13395-<br>2 | 94.6<br>94.8   | 84.9<br>86.5   | 85.9<br>87.0   | 86.1<br>87.4         |                      | 99.7<br>99.7   | 96.8<br>96.8   | 88.9<br>90.5   | 96.8<br>96.8         | 40.8<br>46.9         | 99.3<br>99.2   |
| PtAV-13396       | 94.7<br>94.9   | 85.0<br>86.5   | 86.0<br>87.0   | 86.1<br>87.2         | 99.6<br>99.7         |                | 97.1<br>97.0   | 88.9<br>90.5   | 97.1<br>97.0         | 40.8<br>46.9         | 99.6<br>99.5   |
| PtAV-13421       | 99.1<br>99.0   | 85.1<br>86.5   | 85.3<br>86.5   | 85.6<br>87.0         | 94.8<br>95.0         | 95.0<br>95.0   |                | 89.0<br>90.8   | 99.6<br>99.5         | 40.8<br>46.9         | 97.0<br>96.9   |
| PtAV-13430       | 85.1<br>86.4   | 99.4<br>99.3   | 89.5<br>90.2   | 89.5<br>90.2         | 85.0<br>86.5         | 85.0<br>86.4   | 85.0<br>86.4   |                | 88.9<br>90.5         | 41.0<br>46.9         | 88.9<br>90.4   |
| PtAV-13438-<br>1 | 99.3<br>99.2   | 84.9<br>86.4   | 85.3<br>86.6   | 85.7<br>87.1         | 94.7<br>95.0         | 94.8<br>95.0   | 99.3<br>99.4   | 84.9<br>86.3   |                      | 40.7<br>46.8         | 97.2<br>97.2   |
| PtAV-13438-<br>2 | 48.2<br>50.8   | 49.3<br>52.2   | 48.7<br>51.9   | 48.8<br>52.1         | 47.8<br>50.6         | 47.8<br>50.7   | 48.2<br>50.9   | 49.3<br>52.2   | 48.1<br>50.9         |                      | 40.7<br>46.8   |
| PtAV-13442       | 94.8<br>95.0   | 85.0<br>86.5   | 86.2<br>87.2   | 86.4<br>87.5         | 98.7<br>99.0         | 98.9<br>99.1   | 95.0<br>95.1   | 85.0<br>86.5   | 94.9<br>95.2         | 47.9<br>50.6         |                |

Nucleic acid identities (in black font) of the coding region (the genome sequence excluding the 5' and 3' untranslated regions) and ORF2 are shown in the bottom left half of the table while amino acid identities (in red font) of the predicted ORF1–ORF2 fusion protein and the ORF2 product are shown in the top right half. In each cell, the value on the top is the pairwise identity of the coding region/fusion protein while the one at the bottom is the pairwise identity ORF2 or its product.

**Table S13.** Closest matches of the predicted Pterostylis amalgavirus fusion protein and ORF2 product from BLASTP searches of the NCBI non-redundant protein sequence database.

| <b>Virus Protein</b>               | <b>Isolate</b> | <b>Virus Name of the Closest Hit</b> | <b>GenBank Accession Number of the Closest Hit</b> | <b>E-value</b> | <b>Query Coverage (%)</b> | <b>Pairwise Identity (%)</b> |
|------------------------------------|----------------|--------------------------------------|----------------------------------------------------|----------------|---------------------------|------------------------------|
| ORF1–<br>ORF2<br>Fusion<br>Protein | PtAV-13365     | Festuca pratensis amalgavirus 3      | DAB41731.1                                         | 0.0            | 95                        | 45.7                         |
|                                    | PtAV-13392     | Festuca pratensis amalgavirus 3      | DAB41731.1                                         | 0.0            | 95                        | 46.4                         |
|                                    | PtAV-13394     | Camellia totivirus A *               | QED42799.1                                         | 0.0            | 96                        | 47.9                         |
|                                    | PtAV-13395-1   | Camellia totivirus A *               | QED42799.1                                         | 0.0            | 96                        | 47.9                         |
|                                    | PtAV-13395-2   | Festuca pratensis amalgavirus 3      | DAB41731.1                                         | 0.0            | 94                        | 46.1                         |
|                                    | PtAV-13396     | Festuca pratensis amalgavirus 3      | DAB41731.1                                         | 0.0            | 95                        | 45.8                         |
|                                    | PtAV-13421     | Festuca pratensis amalgavirus 3      | DAB41731.1                                         | 0.0            | 95                        | 46.0                         |
|                                    | PtAV-13430     | Festuca pratensis amalgavirus 3      | DAB41731.1                                         | 0.0            | 95                        | 46.3                         |
|                                    | PtAV-13438-1   | Festuca pratensis amalgavirus 3      | DAB41731.1                                         | 0.0            | 95                        | 45.8                         |
|                                    | PtAV-13438-2   | Gevuina avellana amalgavirus 1       | DAB41733.1                                         | 0.0            | 99                        | 53.5                         |
|                                    | PtAV-13442     | Festuca pratensis amalgavirus 3      | DAB41731.1                                         | 0.0            | 95                        | 45.7                         |
| Product<br>of ORF2                 | PtAV-13365     | Zostera marina amalgavirus 2         | YP_009362304.1                                     | 0.0            | 92                        | 56.6                         |
|                                    | PtAV-13392     | Camellia totivirus A *               | QED42799.1                                         | 0.0            | 98                        | 53.7                         |
|                                    | PtAV-13394     | Camellia totivirus A *               | QED42799.1                                         | 0.0            | 95                        | 54.7                         |
|                                    | PtAV-13395-1   | Camellia totivirus A *               | QED42799.1                                         | 0.0            | 95                        | 54.7                         |
|                                    | PtAV-13395-2   | Zostera marina amalgavirus 2         | YP_009362304.1                                     | 0.0            | 93                        | 56.7                         |
|                                    | PtAV-13396     | Zostera marina amalgavirus 2         | YP_009362304.1                                     | 0.0            | 93                        | 56.7                         |
|                                    | PtAV-13421     | Zostera marina amalgavirus 2         | YP_009362304.1                                     | 0.0            | 92                        | 56.7                         |
|                                    | PtAV-13430     | Camellia totivirus A *               | QED42799.1                                         | 0.0            | 98                        | 53.7                         |
|                                    | PtAV-13438-1   | Zostera marina amalgavirus 2         | YP_009362304.1                                     | 0.0            | 92                        | 56.7                         |
|                                    | PtAV-13438-2   | Gevuina avellana amalgavirus 1       | DAB41733.1                                         | 0.0            | 99                        | 59.0                         |
|                                    | PtAV-13442     | Zostera marina amalgavirus 2         | YP_009362304.1                                     | 0.0            | 93                        | 56.5                         |

\* Homology search suggested the virus should be classified as an amalgavirus rather than a totivirus

**Table S14.** Pairwise sequence identities (%) of the totiviruses identified in this study.

|               | Pt-TV-13365 | Pt-TV-13421-1 | Pt-TV-13421-2 | Pt-TV-GF | Pt-TV-HR |
|---------------|-------------|---------------|---------------|----------|----------|
| Pt-TV-13365   |             | 95.0          | 66.4          | 94.9     | 94.9     |
| Pt-TV-13421-1 | 80.6        |               | 66.4          | 97.7     | 97.7     |
| Pt-TV-13421-2 | 64.4        | 64.4          |               | 66.5     | 66.3     |
| Pt-TV-GF      | 80.8        | 86.3          | 64.1          |          | 99.4     |
| Pt-TV-HR      | 80.4        | 86.2          | 63.9          | 98.0     |          |

Nucleic acid identities (in black font) of the coding regions (the genome excluding the 5' and 3' untranslated regions) are shown in the bottom left half of the table while amino acid identities (in red font) of the ORF1–ORF2 fusion protein are shown in the top right half.

**Table S15.** Closest matches of the predicted Pterostylis totivirus fusion protein and ORF2 product from BLASTP searches of the NCBI non-redundant protein sequence database.

| Virus Protein            | Isolate      | Virus Name of the Closest Hit     | GenBank Accession Number of the Closest Hit | E-value | Query Coverage (%) | Pairwise Identity (%) |
|--------------------------|--------------|-----------------------------------|---------------------------------------------|---------|--------------------|-----------------------|
| ORF1–ORF2 Fusion Protein | PtTV-13365   | maize-associated totivirus 3      | AUH27273.1                                  | 0.0     | 99                 | 43.5                  |
|                          | PtTV-13421-1 | maize-associated totivirus 3      | AUH27273.1                                  | 0.0     | 99                 | 43.8                  |
|                          | PtTV-13421-2 | maize-associated totivirus 3      | AUH27273.1                                  | 0.0     | 99                 | 43.5                  |
|                          | PtTV-GF      | maize-associated totivirus 3      | AUH27273.1                                  | 0.0     | 99                 | 43.5                  |
|                          | PtTV-HR      | maize-associated totivirus 3      | AUH27273.1                                  | 0.0     | 99                 | 43.5                  |
| Product of ORF2          | PtTV-13365   | Pterostylis sanguinea totivirus A | AOX47551.1                                  | 0.0     | 91                 | 69.9                  |
|                          | PtTV-13421-1 | Pterostylis sanguinea totivirus A | AOX47551.1                                  | 0.0     | 91                 | 69.8                  |
|                          | PtTV-13421-2 | Pterostylis sanguinea totivirus A | AOX47551.1                                  | 0.0     | 91                 | 68.6                  |
|                          | PtTV-GF      | Pterostylis sanguinea totivirus A | AOX47551.1                                  | 0.0     | 91                 | 69.7                  |
|                          | PtTV-HR      | Pterostylis sanguinea totivirus A | AOX47551.1                                  | 0.0     | 91                 | 69.7                  |

**Table S16.** Closest matches of the predicted Pterostylis polerovirus proteins from BLASTP searches of the NCBI non-redundant protein sequence database.

| Virus Protein | Virus Name of the Closest Hit | GenBank Accession Number of the Closest Hit | E-value | Query Coverage (%) | Pairwise Identity (%) |
|---------------|-------------------------------|---------------------------------------------|---------|--------------------|-----------------------|
| P0            | cereal yellow dwarf virus RPS | QGT40983.1                                  | 3E-08   | 78                 | 29.4                  |
| P1            | tobacco yellow virus          | QIZ03428.1                                  | 4E-126  | 99                 | 38.4                  |
| P2 *          | potato leafroll virus         | AAL77939.1                                  | 0.0     | 89                 | 67.2                  |
| P1–P2         | potato leafroll virus         | ARS33717.1                                  | 0.0     | 99                 | 51.1                  |
| P3a           | beet mild yellowing virus     | QYA72330.1                                  | 4E-14   | 97                 | 68.9                  |
| P3            | cereal yellow dwarf virus RPV | QDM54317.1                                  | 5E-78   | 99                 | 68.1                  |
| P4            | potato leafroll virus         | ABY49849.1                                  | 6E-39   | 98                 | 64.6                  |
| P3–P5         | Brassica yellows virus        | BBG75785.1                                  | 0.0     | 90                 | 55.4                  |

\* Product of ORF2

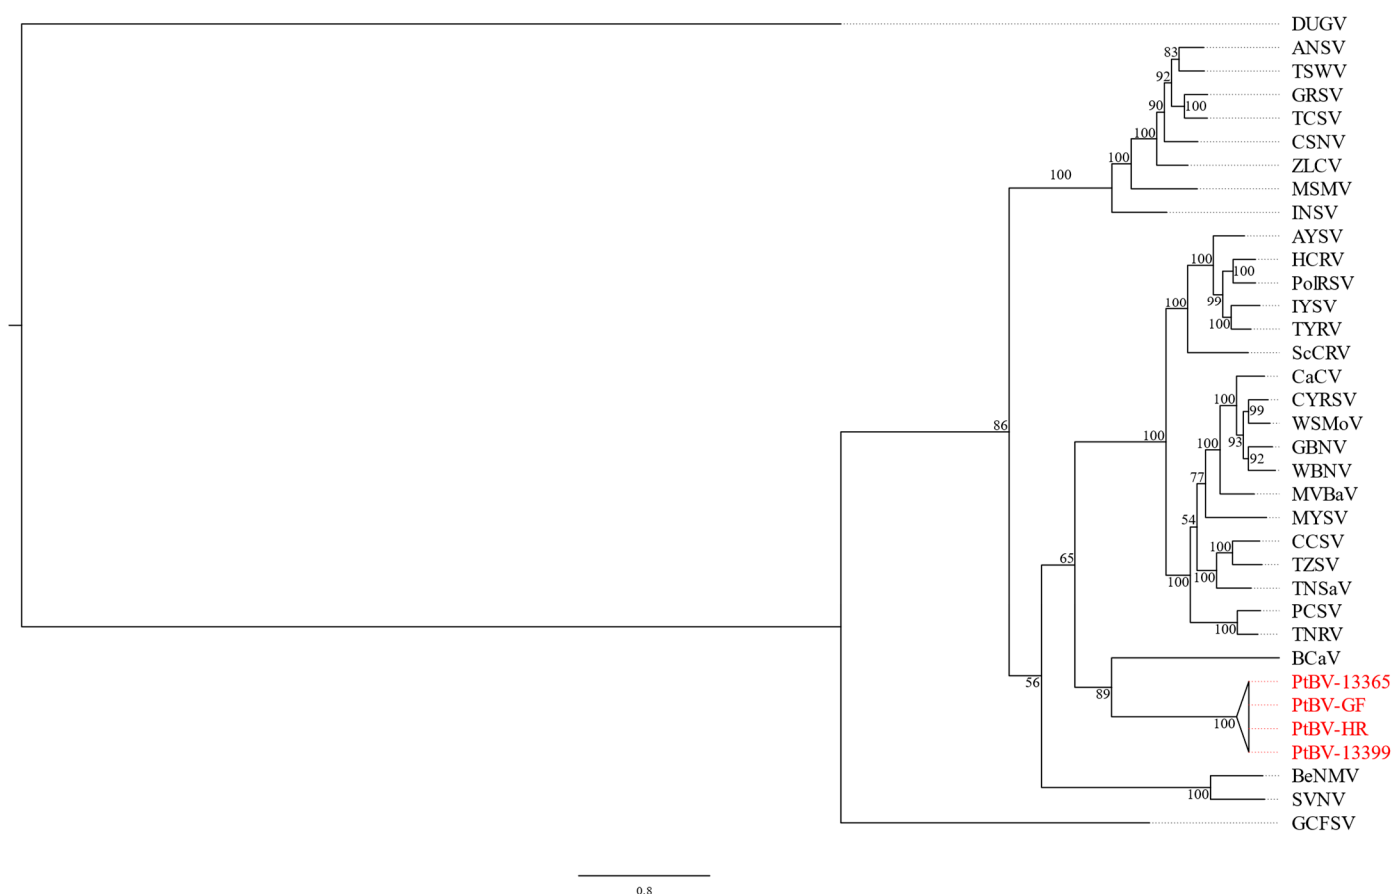

**Figure S1.** Maximum likelihood phylogenetic tree based on RNA dependent RNA polymerase gene rooted to Dugbe virus (DUGV). The nucleotide substitution model used was GTR+F+R4. The acronyms in red font correspond to Pterostylis blotch virus (PtBV) sequences. The other virus acronyms are defined in Table S3. The numbers next to the branches are non-parametric bootstrap values based on 1000 replicates.

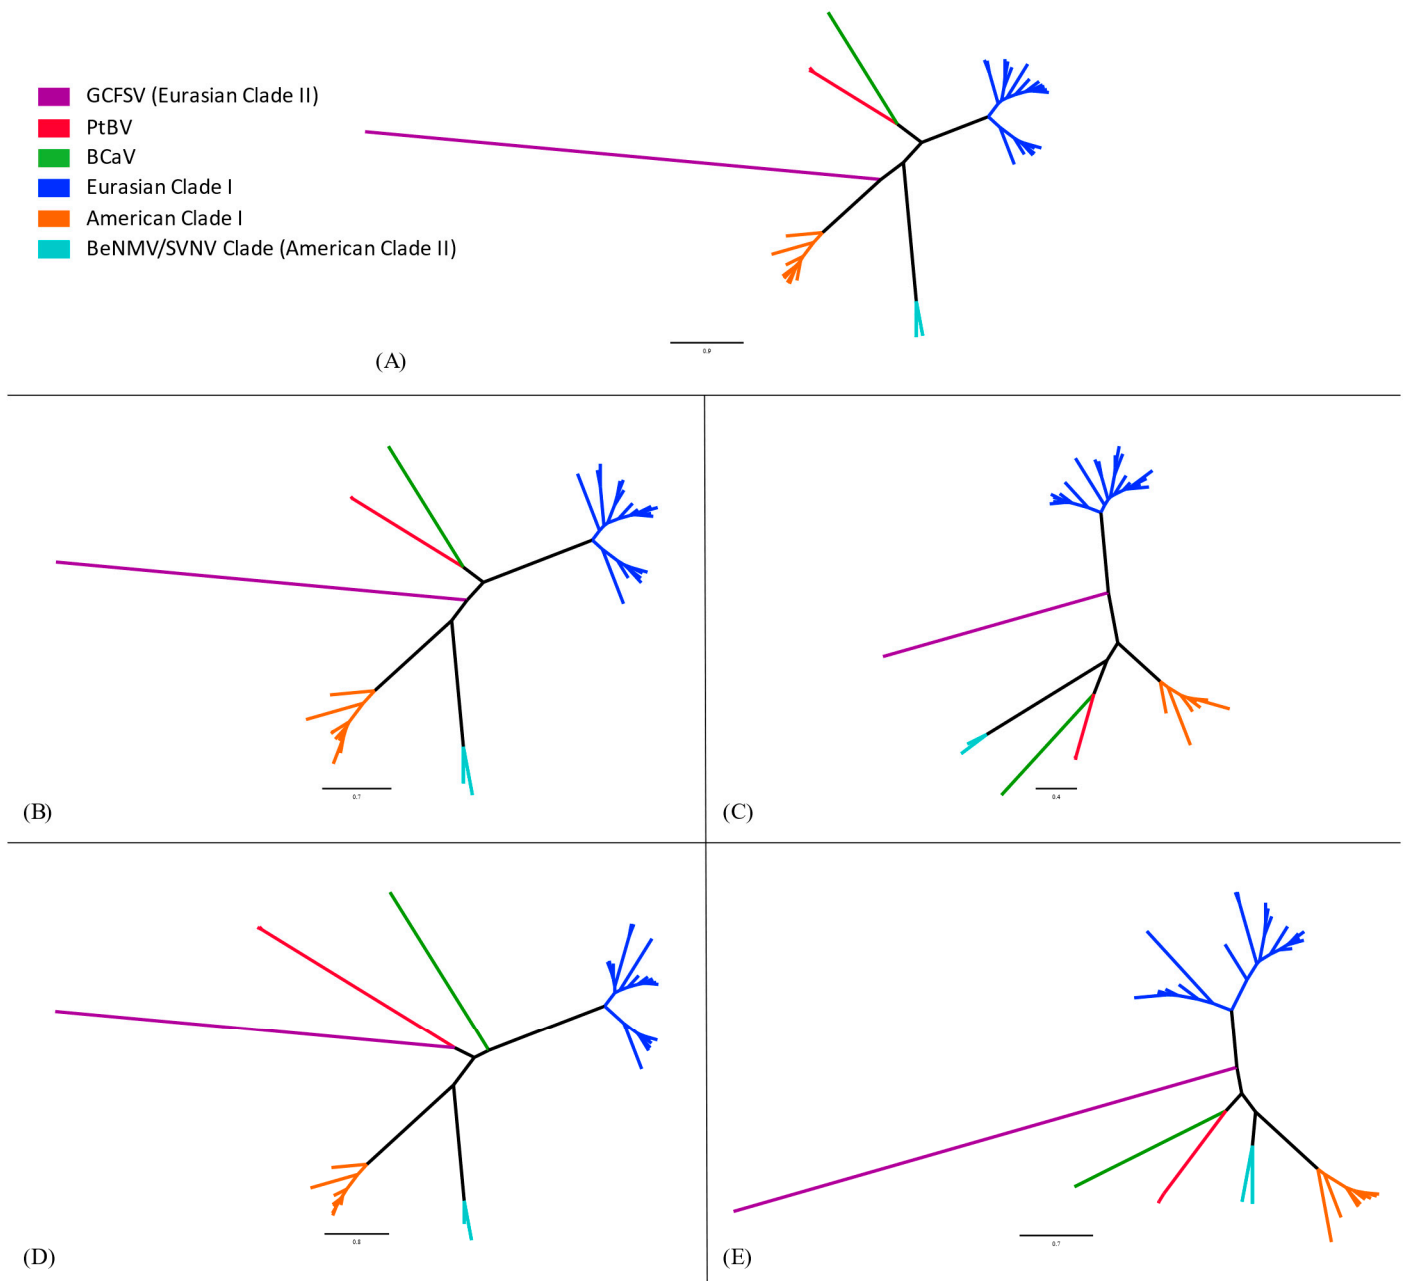

**Figure S2.** Maximum likelihood phylogenetic gene trees of orthotospoviruses. (A) RNA dependent RNA polymerase; substitution model: GTR+F+R6. (B) Non-structural protein, M segment; substitution model: GTR+F+R5. (C) Glycoprotein precursor; substitution model: GTR+F+G4. (D) Non-structural protein, S segment; substitution model: TPM3+F+I+G4. (E) Nucleocapsid protein; substitution model: GTR+F+I+G4. GCFSV, groundnut chlorotic fan-spot virus; PtBV, Pterostylis blotch virus; BCaV, Barleria chlorosis-associated virus; BeNMV, bean necrotic mosaic virus; SVNV, soybean vein necrosis virus.



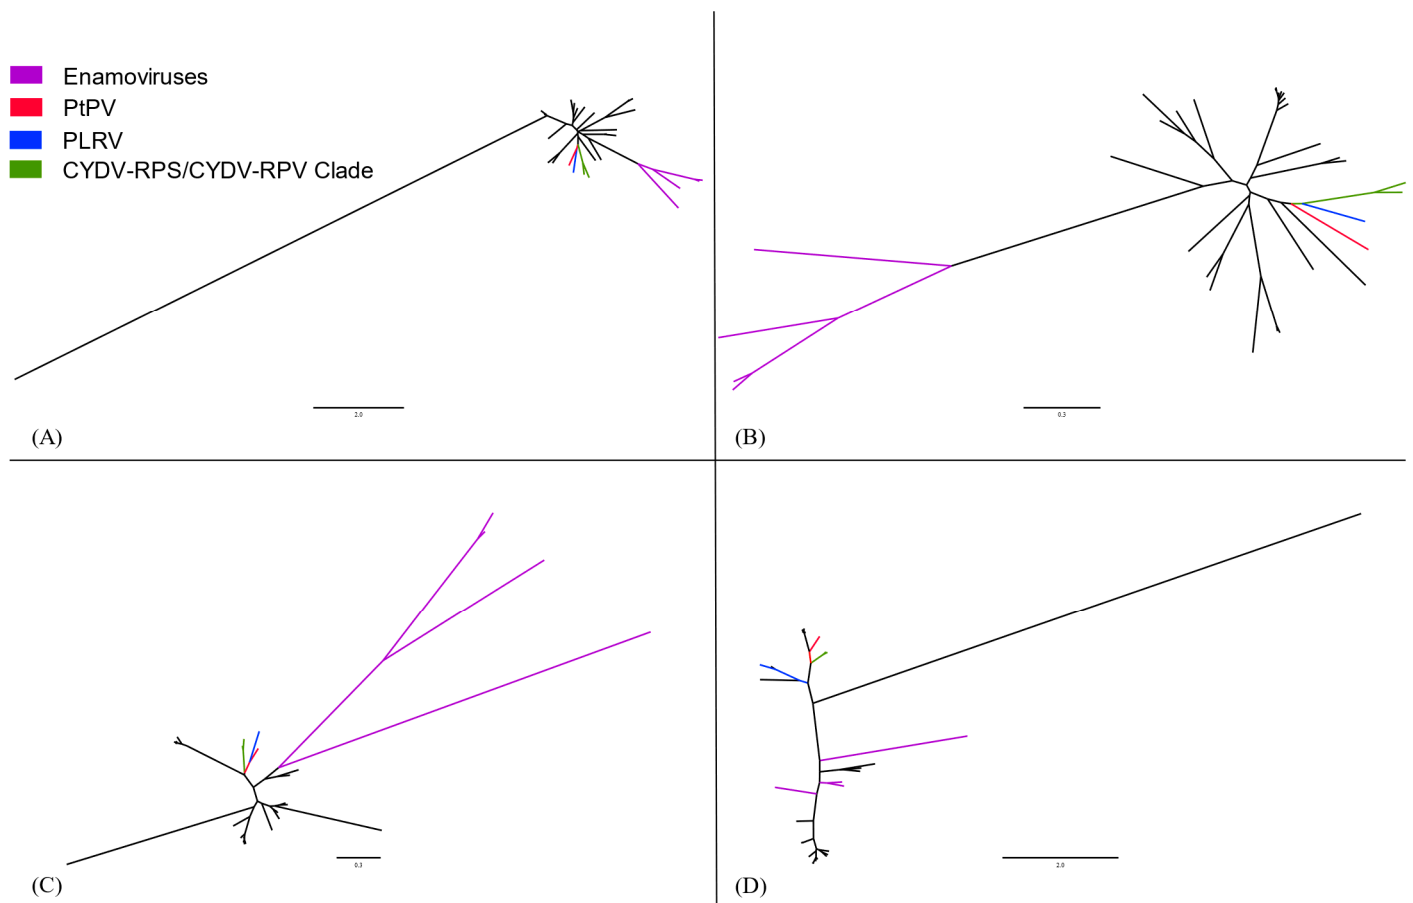

**Figure S3.** Maximum likelihood phylogenetic gene trees of poleroviruses and enamoviruses. (A) Conserved domain of serine proteinase; substitution model: TIM2e+R4. (B) Conserved domain of RNA dependent RNA polymerase; substitution model: SYM+I+G4. (C) Conserved domain of major capsid protein; substitution model: TIM2e+G4. (D) Conserved domain of minor capsid protein; substitution model: TIM2e+G4. PtPV, Pterostylis polerovirus; PLRV, potato leafroll virus; CYDV, cereal yellow dwarf virus.
